# Supplementary material
Source: publisher site journal article supplement (https://www.dovepress.com/get_supplementary_file.php?f=381565.docx)
Supplement: Supplementary file 1 [file get_supplementary_file.php]

**Supplementary Table 1-Comparison of the distribution of paired reading in risk zone in SEG and PEG**

| **Time** | **Error grid** | **Zone A** | **Zone B** | **Zone C** | **Zone D** | **Zone E** | **NA** | **Total Pairs** | **χ2** | ***P*** |
| --- | --- | --- | --- | --- | --- | --- | --- | --- | --- | --- |
| **3 AM** | SEG | 499 | 295 | 530 | 7 | 0 | 0 | 1331 | 828.570 | <0.001 |
| PEG | 666 | 656 | 8 | 1 | 0 | 0 | 1331 |
| **7 AM** | SEG | 4670 | 754 | 371 | 5 | 0 | 0 | 5800 | 657.861 | <0.001 |
| PEG | 4366 | 1424 | 10 | 0 | 0 | 0 | 5800 |
| **9 AM** | SEG | 2306 | 422 | 134 | 3 | 0 | 0 | 2865 | 150.534 | <0.001 |
| PEG | 2171 | 670 | 23 | 0 | 0 | 1 | 2865 |
| **11 AM** | SEG | 2544 | 441 | 169 | 3 | 0 | 0 | 3157 | 204.662 | <0.001 |
| PEG | 2535 | 613 | 9 | 0 | 0 | 0 | 3157 |
| **1 PM** | SEG | 2280 | 488 | 157 | 5 | 0 | 0 | 2930 | 173.826 | <0.001 |
| PEG | 2154 | 752 | 23 | 1 | 0 | 0 | 2930 |
| **5 PM** | SEG | 2629 | 391 | 168 | 3 | 0 | 0 | 3191 | 257.818 | <0.001 |
| PEG | 2553 | 633 | 4 | 1 | 0 | 0 | 3191 |
| **7 PM** | SEG | 2356 | 445 | 146 | 2 | 0 | 0 | 2949 | 189.910 | <0.001 |
| PEG | 2204 | 727 | 17 | 1 | 0 | 0 | 2949 |
| **9 PM** | SEG | 2764 | 420 | 171 | 1 | 0 | 0 | 3356 | 225.734 | <0.001 |
| PEG | 2670 | 674 | 12 | 0 | 0 | 0 | 3356 |
| **SUM** | SEG | 20048 | 3656 | 1846 | 29 | 0 | 0 | 25579 | 2556.543 | <0.001 |
| PEG | 19319 | 6149 | 106 | 4 | 0 | 1 | 25579 |

NA: not included in analysis as data out of range of error grid: PEG>500 mg/dl, SEG>600 mg/dl.

**Supplementary Table 2-Degree and range of risk scores and the risk zones of the SEG**

| **Degree of risk** | **Range of risk scores** | **Risk zone coding** | **Risk Zone (A-E)** | **Color family** |
| --- | --- | --- | --- | --- |
| **None** | [−0.5, 0.5] | 0 | A | Green |
| **Slight for hypoglycemia, lower** | [−1.0, −0.5) | −1 | B | Yellow |
| **Slight for hypoglycemia, higher** | [−1.5, −1.0) | −2 | C | Yellow |
| **Moderate for hypoglycemia, lower** | [−2.0, −1.5) | −3 | C | Orange |
| **Moderate for hypoglycemia, higher** | [−2.5, −2.0) | −4 | D | Orange |
| **Great for hypoglycemia, lower** | [−3.0, −2.5) | −5 | D | Red |
| **Great for hypoglycemia, higher** | [−3.5, −3.0) | −6 | E | Red |
| **Extreme for hypoglycemia** | [−4.0, −3.5) | −7 | E | Brown |
| **Slight for hyperglycemia, lower** | (0.5, 1.0] | 1 | B | Yellow |
| **Slight for hyperglycemia, higher** | (1.0, 1.5] | 2 | C | Yellow |
| **Moderate for hyperglycemia, lower** | (1.5, 2.0] | 3 | C | Orange |
| **Moderate for hyperglycemia, higher** | (2.0, 2.5] | 4 | D | Orange |
| **Great for hyperglycemia, lower** | (2.5, 3.0] | 5 | D | Red |
| **Great for hyperglycemia, higher** | (3.0, 3.5] | 6 | E | Red |
| **Extreme for hyperglycemia** | (3.5, 4.0] | 7 | E | Brown |

**Supplementary Table 3-Correspondence of the paired readings in the SEG’s risk zone D to the risk zone in PEG**

| **NO.** | **FGM (mg/dl)** | **REF (mg/dl)** | **SEG risk score** | **SEG risk grade** | **PEG risk grade** | **SEG risk code** |
| --- | --- | --- | --- | --- | --- | --- |
| **1** | 58 | 301 | 2.5318 | D | D | 5 |
| **2** | 61 | 326 | 2.4198 | D | D | 4 |
| **3** | 40 | 157 | 2.3969 | D | C | 4 |
| **4** | 45 | 162 | 2.2952 | D | C | 4 |
| **5** | 54 | 205 | 2.2799 | D | C | 4 |
| **6** | 58 | 230 | 2.2799 | D | C | 4 |
| **7** | 65 | 259 | 2.257 | D | C | 4 |
| **8** | 47 | 171 | 2.257 | D | C | 4 |
| **9** | 68 | 279 | 2.2366 | D | C | 4 |
| **10** | 50 | 175 | 2.2137 | D | C | 4 |
| **11** | 50 | 167 | 2.2112 | D | C | 4 |
| **12** | 50 | 164 | 2.2112 | D | C | 4 |
| **13** | 47 | 158 | 2.1908 | D | C | 4 |
| **14** | 70 | 257 | 2.1705 | D | C | 4 |
| **15** | 58 | 184 | 2.1399 | D | C | 4 |
| **16** | 58 | 185 | 2.1399 | D | C | 4 |
| **17** | 41 | 146 | 2.1145 | D | C | 4 |
| **18** | 41 | 142 | 2.1145 | D | C | 4 |
| **19** | 68 | 216 | 2.0789 | D | C | 4 |
| **20** | 68 | 202 | 2.0789 | D | C | 4 |
| **21** | 47 | 144 | 2.0712 | D | C | 4 |
| **22** | 49 | 142 | 2.0712 | D | B | 4 |
| **23** | 47 | 144 | 2.0712 | D | C | 4 |
| **24** | 40 | 117 | 2.0534 | D | B | 4 |
| **25** | 304 | 140 | 2.0458 | D | C | 4 |
| **26** | 40 | 108 | 2.0153 | D | B | 4 |
| **27** | 61 | 185 | 2.0076 | D | C | 4 |
| **28** | 61 | 187 | 2.0076 | D | C | 4 |
| **29** | 61 | 185 | 2.0076 | D | C | 4 |
